# Supplementary material
Source: publisher figshare collection journal article supplement (https://springernature.figshare.com/ndownloader/files/21077394)
Supplement: Supplementary file [file 21077394]

# Psychometric properties of the Adelaide Diagnostic Learning Inventory - Brief (ADLIB): Additional File

Harry Minas

---

## Additional file 1: Supplementary Table S1: Adelaide Diagnostic Learning Inventory – Brief (ADLIB)

| Item                                                                                                                         | Response                                                                       |
|------------------------------------------------------------------------------------------------------------------------------|--------------------------------------------------------------------------------|
| 1. I seem to spend less time studying than most students.                                                                    | Please indicate your level of agreement with each of the following statements: |
| 2. I concentrate on the detail so much that I seem to lose sight of the general picture.                                     |                                                                                |
| 3. My habit of putting off work leaves me with far too much to do at the end of term.                                        |                                                                                |
| 4. I suppose I am more interested in the social life than the academic work.                                                 |                                                                                |
| 5. When confronted with a difficult or unsolved problem, I often try to think up possible solutions and then check them out. | 0 Strongly disagree                                                            |
| 6. I like to play around with ideas of my own related to what I'm studying.                                                  | 1 Partly disagree                                                              |
| 7. I worry a lot about whether I will fail the exams.                                                                        | 2 Partly agree                                                                 |
| 8. In trying to understand new ideas I generally set out to relate them, if possible, to real-life experience.               | 3 Strongly agree                                                               |
| 9. I find it helpful to 'map out' a new topic for myself seeing how the ideas fit together.                                  |                                                                                |
| 10. I generally put a lot of effort into learning, but I still have trouble making it stick.                                 |                                                                                |
| 11. I often worry about whether I will be able to cope with this course itself.                                              |                                                                                |
| 12. I work hard but am rarely satisfied with my results.                                                                     |                                                                                |
| 13. After reading something important, I often think about it for a while.                                                   |                                                                                |
| 14. When I am tackling something new, I often try to visualise a situation to which it might apply.                          |                                                                                |
| 15. I have trouble organising the information I have to remember.                                                            |                                                                                |
| 16. I suppose I really do not spend enough time studying.                                                                    |                                                                                |
| 17. I rarely find time to look over my notes during term-time.                                                               |                                                                                |
| 18. I find it impossible to keep a regular schedule for studying.                                                            |                                                                                |
| 19. Although I generally remember facts and details, I find it difficult to fit them together into an overall picture.       |                                                                                |
| 20. I usually cope with exams by 'cramming' just before they come up.                                                        |                                                                                |
| 21. In looking at experimental or clinical results, I generally try to work out several alternative interpretations.         |                                                                                |

**Additional file 1: Supplementary Table S2A: Measures included in one or both surveys**

| Measure                                                                                                                                                                | Items | Response                                                                                | Components | Conbach's $\alpha$    |
|------------------------------------------------------------------------------------------------------------------------------------------------------------------------|-------|-----------------------------------------------------------------------------------------|------------|-----------------------|
| <b>Adelaide Diagnostic Learning Inventory-Brief (ADLIB)</b><br>Included in Sample 1: medical students and Sample 2: physiotherapy students survey<br>Additional File 1 | 21    | 0 Strongly disagree<br>1 Partly disagree<br>2 Partly agree<br>3 Strongly agree          | 3          | Range:<br>0.75 – 0.87 |
| <b>Patient Interaction Questionnaire (PIQ)</b><br>Included in Sample 1: medical students survey<br>Additional File 2                                                   | 10    | 0 Strongly disagree<br>1 Partly disagree<br>2 Partly agree<br>3 Strongly agree          | 1          | 0.77                  |
| <b>Medical Practices Anxieties Questionnaire (MPAQ)</b><br>Included in Sample 1: medical students survey<br>Additional File 3                                          | 25    | 0 Not anxious<br>1 Slightly anxious<br>2 Fairly anxious<br>3 Very anxious               | 1          | 0.92                  |
| <b>Course Difficulties Inventory (CDI)</b><br>Included in Sample 2: physiotherapy students survey<br>Additional File 4                                                 | 27    | 0 Not at all difficult<br>1 A little difficult<br>2 Quite difficult<br>3 Very difficult | 1          | 0.94                  |
| <b>Brief Measure of English Proficiency (BMEP)</b><br>Included in Sample 2: physiotherapy students survey<br>Additional File 5                                         | 8     | 0 Poor<br>1 Fair<br>2 Good<br>3 Very good<br>4 Excellent                                | 1          | 0.95                  |

## Additional file 1: Supplementary Table S2B: Patient Interaction Questionnaire (PIQ)

(Adapted from: Orbell, S. & Abraham, C. (1993) Behavioural sciences and the real world: report of a community interview scheme for medical student. *Medical Education*, 27:218-228.)

| Item                                                                                                                    | Response                                                                       |
|-------------------------------------------------------------------------------------------------------------------------|--------------------------------------------------------------------------------|
| 1. I am very confident about interviewing patients.                                                                     | Please indicate your level of agreement with each of the following statements: |
| 2. I think patients are, in general, very willing to discuss their medical and personal problems with medical students. |                                                                                |
| 3. In general, I think patients benefit from being interviewed and examined by medical students.                        |                                                                                |
| 4. I think I am quite skillful at asking patients questions which will elicit all the necessary information.            | 0 Strongly disagree                                                            |
| 5. I think I am quite good at expressing to patients my understanding of their feelings during interview.               | 1 Partly disagree                                                              |
| 6. I think I am quite good at communicating to patients my interest in patients' beliefs and experiences.               | 2 Partly agree                                                                 |
| 7. I concentrate very well on what patients are saying when I interview them.                                           | 3 Strongly agree                                                               |
| 8. I am quite good at making notes during a patient interview without disrupting the flow of the interview.             |                                                                                |
| 9. I think I am very aware of the importance of social and psychological factors in patients' health.                   |                                                                                |
| 10. I get very anxious before interviewing patients.                                                                    |                                                                                |

Unidimensional scale. Cronbach's  $\alpha = 0.77$

## Additional file 1: Supplementary Table S2C: Medical Practices Anxieties Questionnaire (MPAQ)

(Adapted from: Moss, F. & McManus, C. (1992) The anxieties of new clinical students. *Medical Education*, 26:17-30)

| Item                                                      | Response                                                                     |
|-----------------------------------------------------------|------------------------------------------------------------------------------|
| 1. Getting diagnoses wrong                                | Please indicate how anxious each of the following situations makes you feel: |
| 2. Presenting cases on ward rounds                        |                                                                              |
| 3. Inadvertently hurting patients                         |                                                                              |
| 4. Helping with a cardiac arrest                          |                                                                              |
| 5. Telling consultants that you do not know something     | 0 Not anxious                                                                |
| 6. Suturing patients in casualty                          | 1 Slightly anxious                                                           |
| 7. Dealing with drunk/abusive patients                    | 2 Fairly anxious                                                             |
| 8. Getting infected by patients                           | 3 Very anxious                                                               |
| 9. Dealing with psychiatric patients                      |                                                                              |
| 10. Making diagnoses                                      |                                                                              |
| 11. Delivering babies                                     |                                                                              |
| 12. Talking with dying patients                           |                                                                              |
| 13. Carrying out rectal examinations                      |                                                                              |
| 14. Carrying out vaginal examinations                     |                                                                              |
| 15. Being asked difficult questions by patients           |                                                                              |
| 16. Dealing with sick children                            |                                                                              |
| 17. Talking to seriously ill patients                     |                                                                              |
| 18. Explaining to a patient that a diagnosis is not known |                                                                              |
| 19. Taking blood from patients                            |                                                                              |
| 20. Giving injections                                     |                                                                              |
| 21. Examining patients                                    |                                                                              |
| 22. Going to post-mortems                                 |                                                                              |
| 23. Being up all night                                    |                                                                              |
| 24. Going to operating theatre                            |                                                                              |
| 25. Undressing patients of the opposite sex               |                                                                              |

Unidimensional scale. Cronbach's  $\alpha = 0.92$

## Additional file 1: Supplementary Table S2D: Course Difficulties Inventory (CDI)

| Item                                                                             | Response                                                                                                                                                                |
|----------------------------------------------------------------------------------|-------------------------------------------------------------------------------------------------------------------------------------------------------------------------|
| 1. understanding what lecturers or tutors say                                    | Please indicate how difficult you have found the following tasks and situations. If you have not been faced with a particular situation please answer "not applicable". |
| 2. taking useful notes in lectures                                               |                                                                                                                                                                         |
| 3. using technical equipment (e.g., in laboratory work, computers, etc.)         |                                                                                                                                                                         |
| 4. participating in seminars or tutorials                                        |                                                                                                                                                                         |
| 5. using the library facilities and services                                     |                                                                                                                                                                         |
| 6. writing reports, essays, assignments or case reports                          |                                                                                                                                                                         |
| 7. doing multiple choice tests                                                   |                                                                                                                                                                         |
| 8. understanding medical textbooks                                               | 0 Not at all difficult<br>1 A little difficult<br>2 Quite difficult<br>3 Very difficult                                                                                 |
| 9. doing tests requiring written answers                                         |                                                                                                                                                                         |
| 10. replying verbally to questions by tutors                                     |                                                                                                                                                                         |
| 12. making yourself understood by others                                         |                                                                                                                                                                         |
| 13. relating to lecturers and tutors on a social level                           |                                                                                                                                                                         |
| 15. keeping up with required reading                                             |                                                                                                                                                                         |
| 16. giving verbal presentations in seminars or tutorials                         |                                                                                                                                                                         |
| 17. submitting assignments on time                                               |                                                                                                                                                                         |
| 18. memorising medical information                                               |                                                                                                                                                                         |
| 19. asking questions in lectures                                                 |                                                                                                                                                                         |
| 20. asking questions in tutorials                                                |                                                                                                                                                                         |
| 21. asking for help from tutors                                                  |                                                                                                                                                                         |
| 22. expressing an opinion in class                                               |                                                                                                                                                                         |
| 23. presenting a clinical case to the class                                      |                                                                                                                                                                         |
| 24. presenting a clinical case to examiners                                      |                                                                                                                                                                         |
| 25. relating theory and information to practical clinical skills                 |                                                                                                                                                                         |
| 26. following instructions in practical laboratory assignments                   |                                                                                                                                                                         |
| 27. conducting a clinical examination of a patient on which you will be assessed |                                                                                                                                                                         |

Unidimensional scale. Cronbach's  $\alpha = 0.94$

### Additional file 1: Supplementary Table S2E: Brief Measure of English Proficiency (BMEP)

| Item                                                                                  | Response                                                                 |
|---------------------------------------------------------------------------------------|--------------------------------------------------------------------------|
| 1. Understanding people in social situations (on the phone, in shops, at parties etc) | How would you rate your English language ability in the following areas? |
| 2. Writing assignments/exams                                                          |                                                                          |
| 3. Reading academic literature for your course                                        |                                                                          |
| 4. Speaking/communicating in social situations                                        | 0 Poor                                                                   |
| 5. Reading fiction books, magazines etc                                               | 1 Fair                                                                   |
| 6. Writing personal letters, notes, messages                                          | 2 Good                                                                   |
| 7. Understanding what others (tutors, lecturers, other students) are saying in class  | 3 Very good                                                              |
| 8. Speaking/communicating in academic situations                                      | 4 Excellent                                                              |

Unidimensional scale. Conbach's  $\alpha = 0.95$
